# Supplementary material for: Hybrid Diffusion Imaging in Mild Traumatic Brain Injury
Source: PubMed Central journal article supplement — J Neurotrauma. 2018 Oct 1;35(20):2377–90. doi: 10.1089/neu.2017.5566 (PMC6196746; doi:10.1089/neu.2017.5566), 2018-10-01
Supplement: Supp_Fig1.pdf [file Supp_Fig1.pdf]

## Supplementary Data

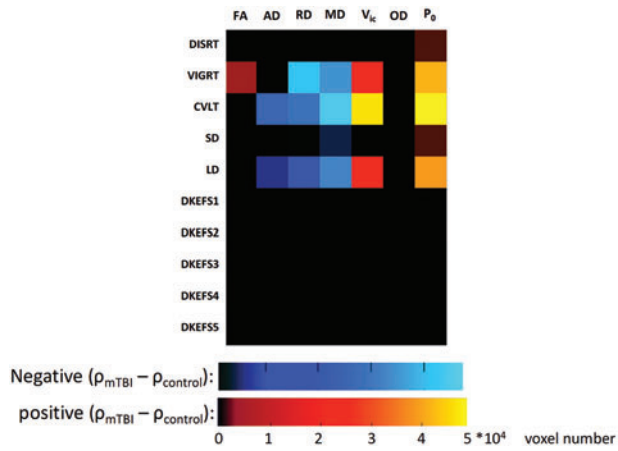

**SUPPLEMENTARY FIG. S1.** Results of the within-group correlations for the trauma-control group. The color-coded matrix summarizes the total number of white matter voxels with significant correlations between the seven diffusion metrics (horizontal) and 10 neuropsychological measures (vertical) in the TBSS analyses. The cold colors indicate negative correlations, whereas the warm colors indicate positive correlations. TBSS, tract-based spatial statistics.
